# Supplementary material
Source: PubMed Central journal article supplement (PMC8492150)

Supplemental Figure 2: Percentage of participants prescribed antibiotic therapy over time by site

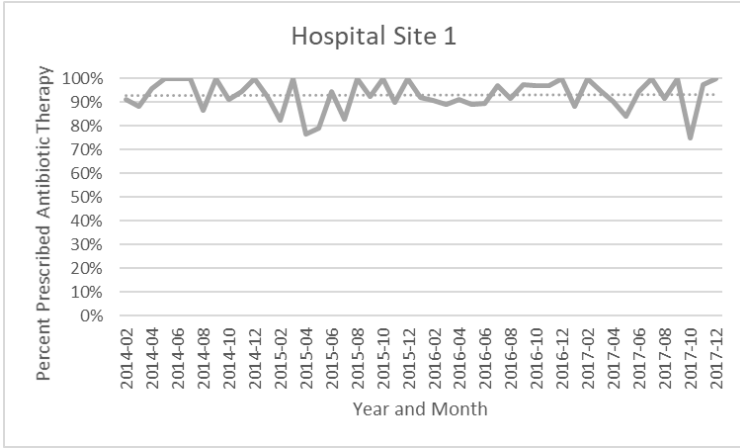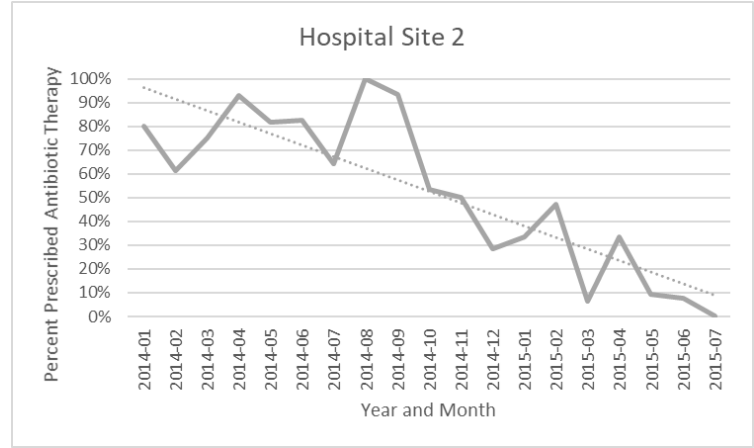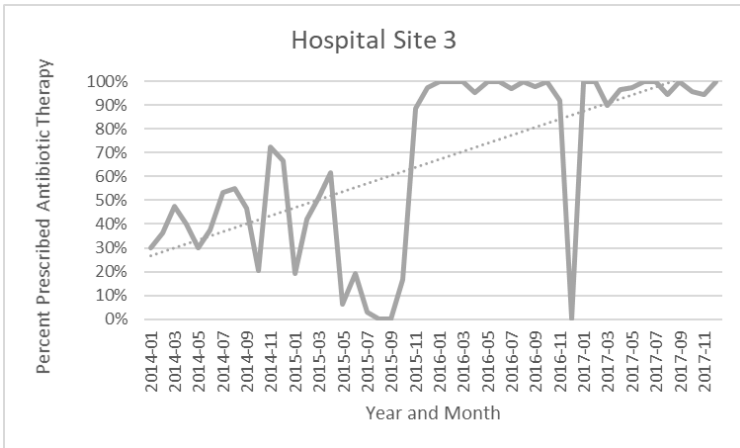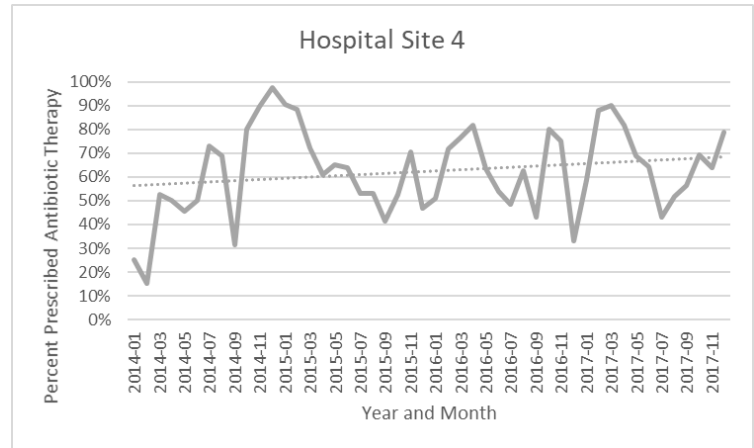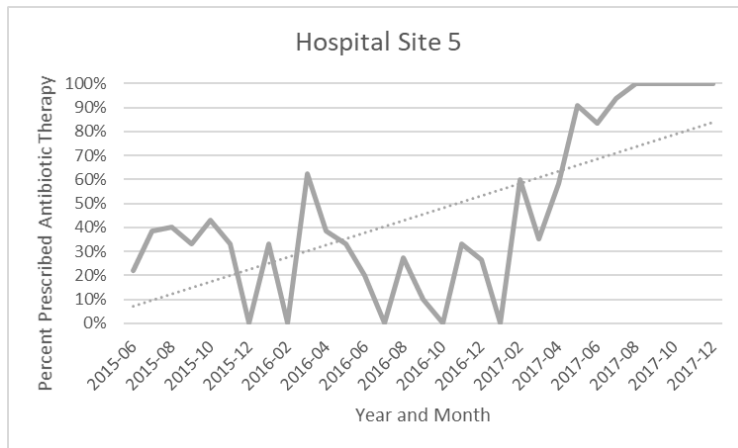

Supplement: ciaa1305_suppl_supplementary-figure-2.pdf [file ciaa1305_suppl_supplementary-figure-2.pdf]
