# Supplementary material
Source: PubMed Central journal article supplement (PMC8492150)
Supplement: ciaa1305_suppl_supplementary-form.pdf [file ciaa1305_suppl_supplementary-form.pdf]

---

Person ID

(Study ID without visit EG: MF0001 is AIC  
Msambweni child 1)

---

Submissiondate

---

Study ID

---

End Aic (internally generated date from tablet. not  
reliable)

---

Today Aic (internally generated date from tablet. not  
reliable)

---

Start Aic (internally generated date from tablet. not  
reliable)

---

DeviceID Aic (internally generated date from tablet.)

---

Subscriber ID

---

What is the hospital site?

---

Is the child enrolled as an HCC patient?

- Yes
- No

---

What is the child's HCC ID number?

---

Which type of visit is this?

- Initial visit, first enrollment
- Initial visit, re-enrollment
- Scheduled one month follow-up
- Sick visit prior to scheduled follow up
- Repeat follow up (patient was febrile during  
scheduled follow up)

---

Interviewer name

---

Other interviewer name

---

Interview date

---

What is the informant's relationship to child/patient?

- Child/Patient
- Mother
- Father
- Sister
- Brother
- Aunt
- Uncle
- Grandmother
- Grandfather
- Other

---

Other informant Relationship

---

---

Child's Date of Birth

---

---

Child's calculated Age

---

---

Child's Gender

- Male
- Female

---

Child's occupation

- 0-2 years (no school yet)
- Madrassa
- Nursery school
- Primary school student
- Secondary school student
- Other student
- Housewife
- Herder
- Business person
- Other
- N/A

---

Other Child Occupation

---

---

What is the child's highest level of education?

- Primary school
- Secondary school
- Technical college
- Professional degree
- Other
- N/A

---

Other child highest level of education

---

---

What is the mom's highest level of education?

- Primary school
- Secondary school
- Technical college
- Professional degree
- Other
- N/A

---

Other Mum highest education level

---

---

What is the roof made out of?

- Natural material
- Corrugated iron
- Plastic
- Other
- N/A

---

Other roof type

---

---

What kind of latrine/toilet do they use?

- None
- Bush
- Pit latrine
- VIP latrine
- Flush toilet
- Other
- N/A

---

Other latrine type

---

---

What is the floor made out of?

- Dirt
- Wood
- Cement
- Tile
- Other
- N/A

---

Other floor type

---

---

Drinking water source

- River or pond
- Rain water
- Public well or borehole
- Inside well
- Public tap or piped
- Water truck
- N/A

---

What is the main source of light at night?

- Electricity line
- Paraffin
- Gas
- Firewood
- Charcoal
- Solar
- Other
- N/A

---

Other light source

---

---

Does child's dwelling have any of the following?

---

---

How many windows are there in the house?

---

---

How many rooms in the house?

---

---

How many people live in the house?

---

---

How many siblings living in the house?

---

---

How many people sleeping in the same room?

---

---

Do they own a telephone?

- Yes  
 No  
 Refused

---

Do they own a radio?

- Yes  
 No  
 Refused

---

Do they own a television?

- Yes  
 No  
 Refused

---

Do they own a bicycle?

- Yes  
 No  
 Refused

---

Do they own a motorized vehicle (i.e. automobile, scooter)?

- Yes  
 No  
 Refused

---

Do they have a domestic worker?

- Yes  
 No  
 Refused

---

Has the child been in contact with other people with similar symptoms in the last 15 days?

- Yes  
 No  
 Refused

---

Does the child usually work outdoors or do outdoor activities?

- Yes  
 No  
 Refused

---

Did the child get bitten by mosquitoes in the last 4 weeks?

- Yes  
 No  
 Refused

---

Does the child use a mosquito coil to avoid mosquitoes?

- Yes  
 No  
 Refused

---

Does the child sleep under a mosquito net?

- Always  
 Sometimes  
 Rarely  
 Never  
 N/A

---

Has the child traveled more than 10km away from home in the last 6 months?

Yes  
 No  
 Refused

---

If yes, where did they travel?

\_\_\_\_\_

---

Did the child spend at least one night in the travel destination?

Yes  
 No  
 Refused

---

Has the child ever been hospitalized?

Yes  
 No  
 Refused

---

Hospitalization history

\_\_\_\_\_

---

Has the child ever had surgery?

Yes  
 No  
 Refused

---

If yes, what was the child's surgery for?

\_\_\_\_\_

---

When was the child's surgery?

\_\_\_\_\_

---

Was the child full term or preterm?

Full term  
 Preterm  
 Does not know

---

Was the patient breast fed as a child?

Yes  
 No  
 Refused

---

If yes, how many months was the patient breast fed?

1 month  
 2 months  
 3 months  
 4 months  
 5 months  
 6 months  
 7 months  
 8 months  
 9 months  
 10 months  
 11 months  
 12 months  
 Between 12-18 months  
 18 months  
 Other  
 Do not know

---

Other how long the patient was breast fed

\_\_\_\_\_

---

Has the child had any vaccinations?

\_\_\_\_\_

---

---

Has the child ever been vaccinated against Yellow Fever?  Yes  
 No  
 Refused

---

If yes, when were they vaccinated?

---

---

Has the child ever been vaccinated against Japanese Encephalitis?  Yes  
 No  
 Refused

---

If yes, when were they vaccinated?

---

---

Past medical history

---

---

Other past medical history

---

---

Is the child currently taking any medications?  Yes  
 No  
 Refused

---

If yes, which ones?

---

---

Other current medications

---

---

Has the patient ever been pregnant?  Yes  
 No  
 Refused

---

---

Is the child currently sick?  Yes  
 No  
 Refused

---

### Current Disease Note

**If the child does not have any symptoms they should not be included in the study.**

How many days has the child been ill/showed symptoms?

---

---

What are the child's current symptoms?

---

---

Other current symptoms

---

---

Temperature (C)

---

---

Child height (cm) (not reliable)

---

---

Child weight (kg) (not reliable)

---

---

Head circumference for children under 2 years old  
(cm) (not reliable)

---

(only in children under 2)

---

Heart rate (beats/minute)

---

(This value is unreliable)

---

Respiratory rate (breaths/minute)

---

(This value is unreliable)

---

Blood pressure measurement available?

- Yes  
 No  
(This value is unreliable)

---

Systolic blood pressure (mmHg)

---

(This value is unreliable)

---

Diastolic blood pressure (mmHg)

---

(This value is unreliable)

---

Pulse oximetry reading (%)

---

(This value is unreliable)

---

Can visual acuity testing be performed?

- Yes  
 Unable to perform because child was too sick  
 Unable to perform because child was too young  
 Unable to perform for another reason"

---

Left eye visual acuity

---

---

Right eye visual acuity

---

---

Head and neck exam

---

---

Clinician's notes on head and neck exam

---

---

Chest exam

---

---

Clinician's notes on chest exam

---

---

Heart exam

---

---

Clinician's notes heart

---

---

Abdomen exam

---

---

Where is the abdominal tenderness?

---

---

Clinician's notes on abdominal exam

---

---

Node exam

---

---

Other node exam

---

---

Clinician's notes on node exam

---

---

Joint exam

---

---

Which joints?

---

---

Clinician's notes on joint exam

---

---

Skin exam

---

---

Other skin exam

---

---

Clinician's notes on skin exam

---

---

Neuro exam

---

---

Other euro exam

---

---

Clinician's notes on neuro exam

---

---

Tourniquet test

- Positive 20 or more
- 10
- Normal
- Not done



---

Which malaria lab test was ordered?

\_\_\_\_\_

---

Specify if other

\_\_\_\_\_

---

Results of malaria blood smear

- Negative
- 1+ (+)
- 2+ (++)
- 3+ (++++)
- 4+ (++++)
- Pending

---

Results of rapid diagnostic test (RDT)

- Positive
- Negative

---

Laboratory tests ordered

\_\_\_\_\_

---

Specify if other

\_\_\_\_\_

---

Wbc (mcl or u)

\_\_\_\_\_

---

% neutrophils

\_\_\_\_\_

---

% lymphhead of compoundytes

\_\_\_\_\_

---

% monocytes

\_\_\_\_\_

---

% eosinophils

\_\_\_\_\_

---

Hemoglobin in blood count test (g/dl)

\_\_\_\_\_

---

MCV

\_\_\_\_\_

---

Platelets count

\_\_\_\_\_

---

Specify which other blood test and enter results.

\_\_\_\_\_

---

Hemoglobin results (g/dl)

\_\_\_\_\_

---

HIV test result

- Reactive
- Non\_reactive
- Unknown
- Refused

---

Urinalysis results

- Normal  
 Abnormal  
 Unknown

---

Enter abnormal urinalysis results.

---

---

Results of stool ova and cyst test

- Normal  
 WBCs  
 Ova\_or\_cysts  
 Other

---

Enter other findings seen on stool test

---

---

Results of Widal or other typhoid test

- positive  
 Negative  
 Unknown

---

Results of sickle cell disease test

- positive  
 negative  
 unknown

---

Specify other tests ordered.

---

---

Enter results of other tests ordered.

---

---

What do you think is the most likely cause of the child's illness?

- Malaria  
 Chikungunya virus  
 Dengue virus  
 Influenza  
 Common cold virus  
 Measles  
 Bacterial infection  
 Other  
 NA

---

Other primary diagnosis

---

---

What type of bacterial illness?

---

---

If your primary diagnosis is not correct, what is your second guess of what could be causing the child's illness?

- I still think it is my primary diagnosis  
 Malaria  
 Chikungunya virus  
 Dengue virus  
 Influenza  
 Common cold virus  
 Measles  
 Bacterial infection  
 Other  
 NA

---

Other secondary diagnosis

---

---

What type of bacterial illness?

---



---

What do you think is the stage of the child's disease?

---



---

Specify if other

---



---

What could be contributing to the child's illness?

---



---

Other health impacts

---



---

Medications prescribed

---



---

Other medicines prescribed

---



---

Outcome

- Sent home, no follow-up
- Sent home with follow-up
- Referred to district hospital
- Referred to provincial hospital for intensive care
- Death
- Other

---

Other outcome

---



---

Was the patient hospitalized?

- Yes
  - No
  - Refused
- ((Philip Chebii (one of the COs in Msambweni) says 'refused' is 'refused to answer'. He is says it is very rare))

---

If yes, where was the patient hospitalized? (visit's outcome)

- Obama Children's Hospital
- Chulaimbo Health Centre
- Msambweni District Hospital
- Ukunda Health Centre
- Other
- N/A

---

Other hospital where hospitalized (visit's outcome)

---



---

When was the patient hospitalized? (visit's outcome)

---



---

Key

---



---

Version

---

---

 Parent Key

---

 (aic\_merged\_past\_med\_history\_past\_hospitalization)

---

 Key Aic Merged Past Med History Past Hospitalization

---

 (aic\_merged\_past\_med\_history\_past\_hospitalization)

---

 Past hospitalizations?

---

 (aic\_merged\_past\_med\_history\_past\_hospitalization)

---

**Past hospitalizations**


---

How many itimes was the patient hospitalized?

---

 (aic\_merged\_past\_med\_history\_past\_hospitalization)

---

 Why was the patient hospitalized? (1)

---

 (aic\_merged\_past\_med\_history\_past\_hospitalization)

---

 When was the patient hospitalized? (1)

---

 (aic\_merged\_past\_med\_history\_past\_hospitalization)

---

 Where was the patient Hospitalized? (1)

- Obama Children's Hospital
- Chulaimbo Health Centre
- Msambweni District Hospital
- Ukunda Health Centre
- Other
- N/A

---

 (aic\_merged\_past\_med\_history\_past\_hospitalization)

---

 If other, specify where patient was hospitalized. (1)

---

 \_\_\_\_\_

---

 How long was the patient hospitalized? (1)

---

 (aic\_merged\_past\_med\_history\_past\_hospitalization)

---

 Why else was the patient hospitalized? (2)

---

 (database\_cleaning)

---

 When else was the patient hospitalized? (2)

---

 (database\_cleaning)

---

 Where else was the patient hospitalized? (2)

- Obama Children's Hospital
- Chulaimbo Health Centre
- Msambweni District Hospital
- Ukunda Health Centre
- Other
- N/A

---

 (database\_cleaning)

---

If other, specify where patient was hospitalized this time. (2)

---

(database\_cleaning)

---

How long was the patient hospitalized this time? (2)

- 0 -3 days
  - 4 - 7 days
  - 2 weeks
  - 3 weeks
  - 4 weeks
  - 5 weeks
  - 6 weeks
  - More than 6 weeks
  - Do not know
- (database\_cleaning)
- 

Why else was the patient hospitalized? (3)

---

(database\_cleaning)

---

When else was the patient hospitalized? (3)

---

(database\_cleaning)

---

Where else was the patient hospitalized? (3)

- Obama Children's Hospital
  - Chulaimbo Health Centre
  - Msambweni District Hospital
  - Ukunda Health Centre
  - Other
  - N/A
- (database\_cleaning)
- 

If other, specify where patient was hospitalized this time. (3)

---

(database\_cleaning)

---

How long was the patient hospitalized this time? (3)

- 0 -3 days
  - 4 - 7 days
  - 2 weeks
  - 3 weeks
  - 4 weeks
  - 5 weeks
  - 6 weeks
  - More than 6 weeks
  - Do not know
- (database\_cleaning)
- 

Why else was the patient hospitalized? (4)

---

(database\_cleaning)

---

When else was the patient hospitalized? (4)

---

(database\_cleaning)

---

---

Where else was the patient hospitalized? (4)

- Obama Children's Hospital
  - Chulaimbo Health Centre
  - Msambweni District Hospital
  - Ukunda Health Centre
  - Other
  - N/A
- (database\_cleaning)
- 

If other, specify where patient was hospitalized this time. (4)

\_\_\_\_\_  
(database\_cleaning)

---

How long was the patient hospitalized this time? (4)

- 0 -3 days
  - 4 - 7 days
  - 2 weeks
  - 3 weeks
  - 4 weeks
  - 5 weeks
  - 6 weeks
  - More than 6 weeks
  - Do not know
- (database\_cleaning)
- 

Why else was the patient hospitalized? (5)

\_\_\_\_\_  
(database\_cleaning)

---

When was the patient hospitalized this time? (5)

\_\_\_\_\_  
(database\_cleaning)

---

Where was the patient Hospitalized this time? (5)

- Obama Children's Hospital
  - Chulaimbo Health Centre
  - Msambweni District Hospital
  - Ukunda Health Centre
  - Other
  - N/A
- (database\_cleaning)
- 

If other, specify where patient was hospitalized this time. (5)

\_\_\_\_\_  
(database\_cleaning)

---

How long was the patient hospitalized this time? (5)

- 0 -3 days
  - 4 - 7 days
  - 2 weeks
  - 3 weeks
  - 4 weeks
  - 5 weeks
  - 6 weeks
  - More than 6 weeks
  - Do not know
- (database\_cleaning)
