# Supplementary material
Source: PubMed Central journal article supplement (PMC8492150)

Supplemental Figure 3: Percentage of malaria test positive participants over time by site

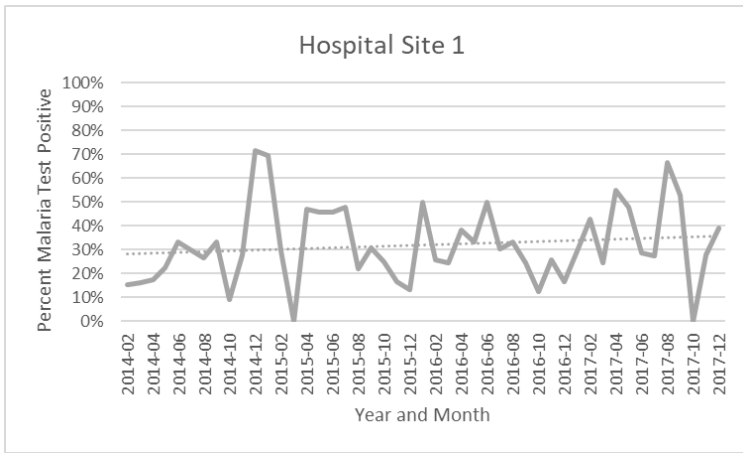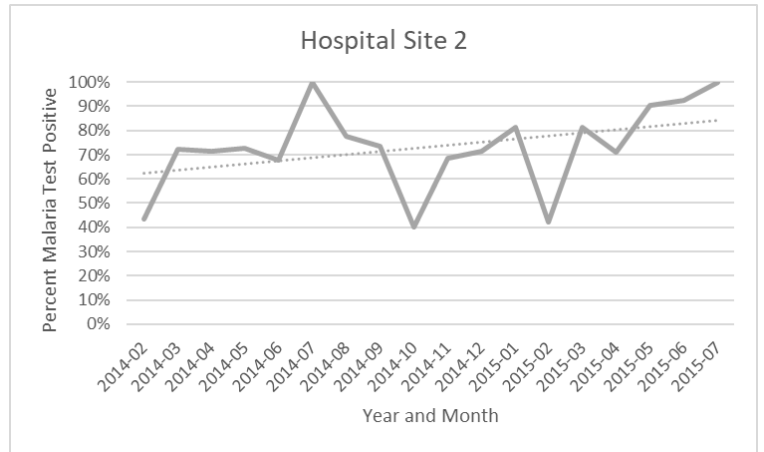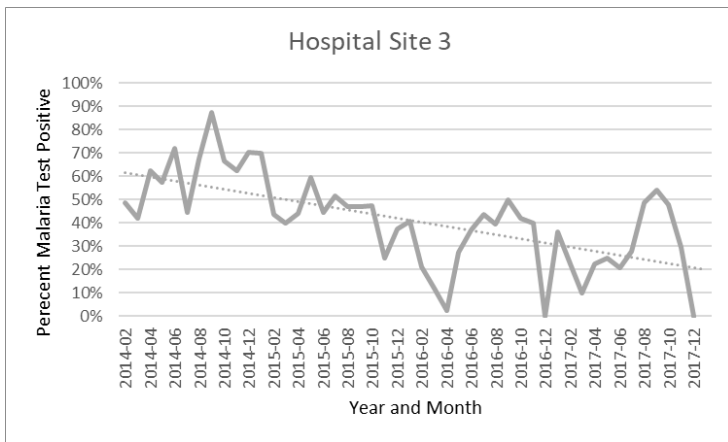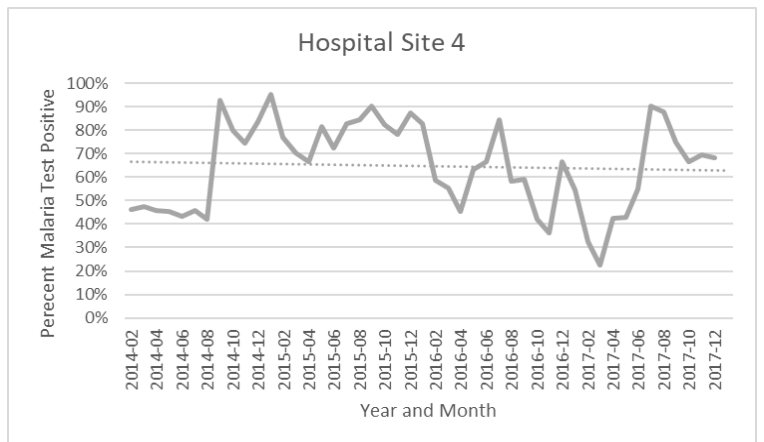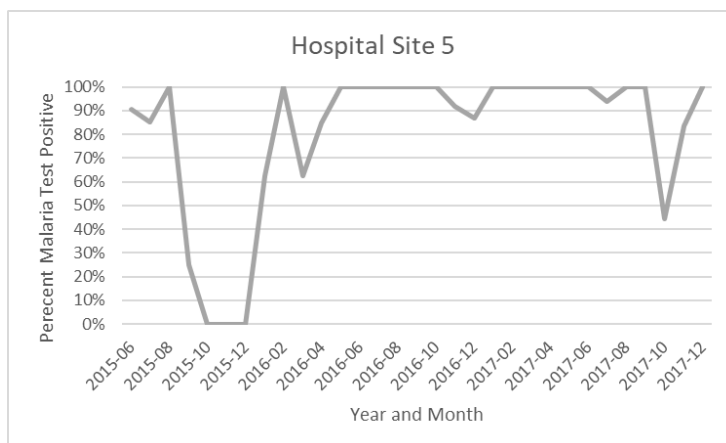

Supplement: ciaa1305_suppl_supplementary-figure-3.pdf [file ciaa1305_suppl_supplementary-figure-3.pdf]
